# Supplementary figures and images for: Isolation of a new two-dimensional honeycomb carbonato-bridged copper(ii) complex exhibiting long-range ferromagnetic ordering
Source: Royal Society of Chemistry journal article supplement (doi:10.1039/b417019a), 2005-01-01

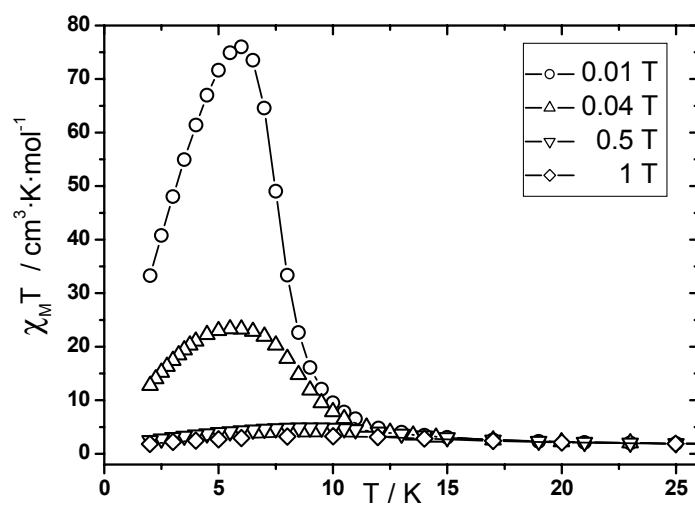

Fig. S1. The  $\chi_M T$  vs.  $T$  curves below 25 K for **1** at an applied field of 1, 0.5, 0.04 and 0.01 T.

Supplement: b417019a.pdf [file b417019a.pdf]
